# Supplementary material for: Design and mechanism of core–shell TiO2 nanoparticles as a high-performance photothermal agent
Source: Royal Society of Chemistry journal article supplement (doi:10.1039/c7nr02848b), 2017-01-01
Supplement: c7nr02848b1.pdf [file c7nr02848b1.pdf]

## Electronic Supplementary Information

### Design and mechanism of core-shell TiO<sub>2</sub> nanoparticles as a high-performance photothermal agent

Lei Sun,<sup>a,c</sup> Zhenglin Li,<sup>a</sup> Zhuo Li,<sup>a</sup> Ying Hu,<sup>d</sup> Chong Chen,<sup>a</sup> Chenhui Yang,<sup>a</sup> Baosheng Du,<sup>b</sup> Ye Sun,<sup>\*b</sup> Flemming Besenbacher,<sup>\*c</sup> and Miao Yu<sup>\*a</sup>

<sup>a</sup>State Key Laboratory of Urban Water Resource and Environment, School of Chemical Engineering and Technology, Harbin Institute of Technology, Harbin 150001, China. E-mail: miaoyu\_che@hit.edu.cn

<sup>b</sup>Condensed Matter Science and Technology Institute, Harbin Institute of Technology, Harbin 150001, China. E-mail: sunye@hit.edu.cn

<sup>c</sup>Interdisciplinary Nanoscience Center (iNANO) and Department of Physics and Astronomy, Aarhus University, Aarhus 8000, Denmark.

E-mail: fbe@inano.au.dk

<sup>d</sup>School of Life Science and Technology, Harbin Institute of Technology, Harbin 150001, China

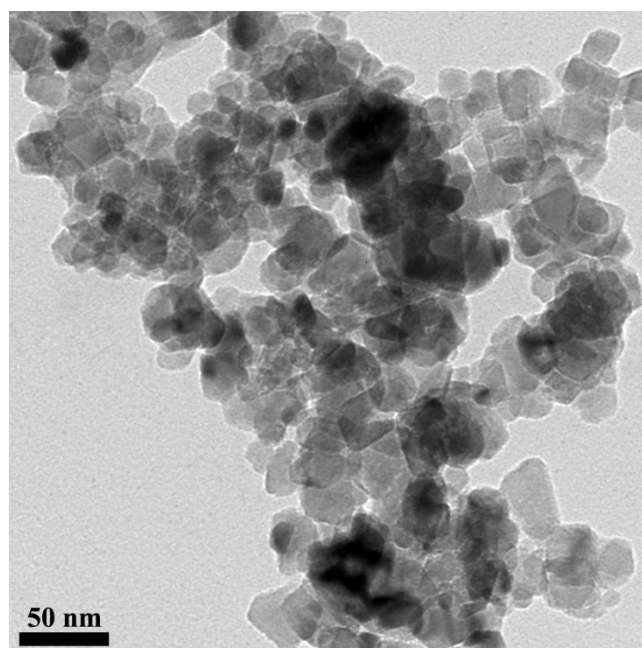

**Figure S1.** TEM image of the pristine  $\text{TiO}_2$ .

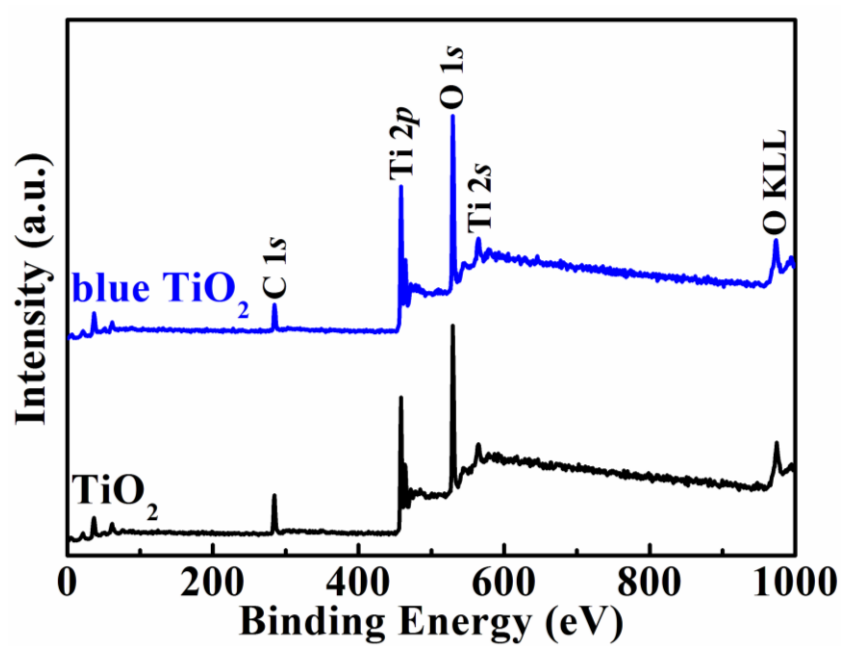

**Figure S2.** XPS survey of the pristine and blue  $\text{TiO}_2$  samples.

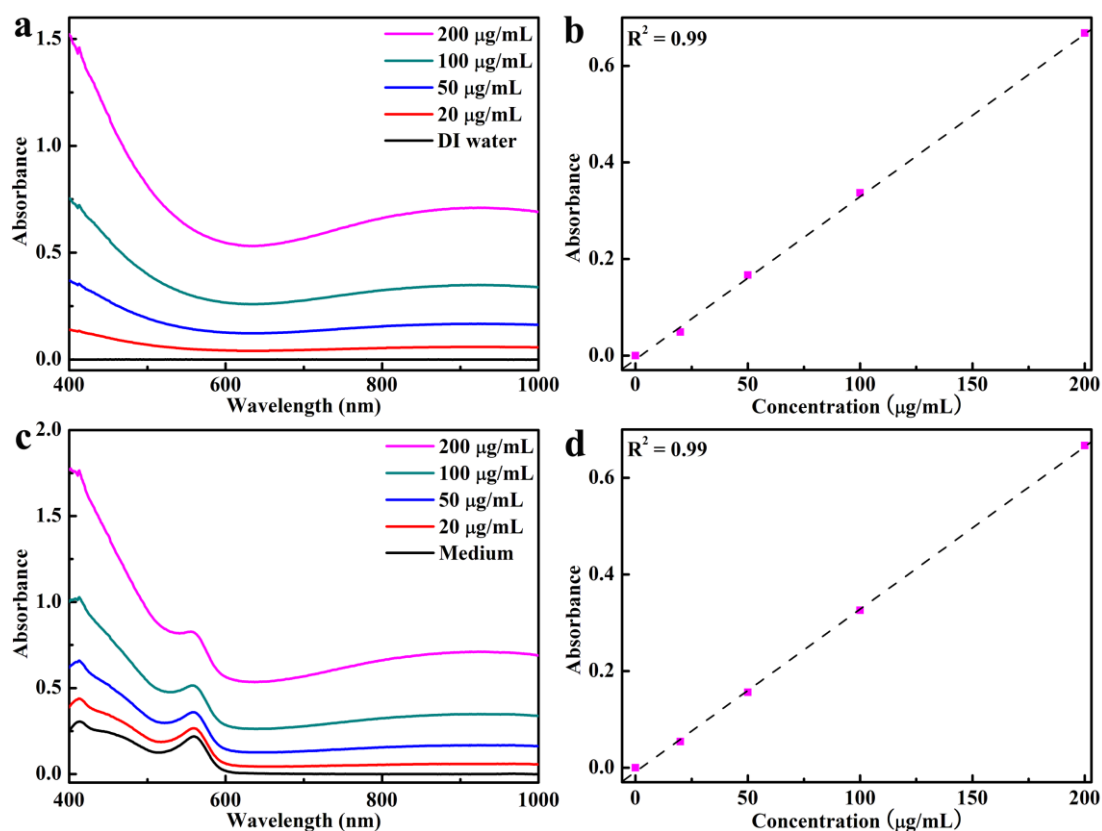

**Figure S3.** (a) UV-Vis-NIR absorption spectra and (b) fitting curve of the absorption values at 808 nm of the blue  $\text{TiO}_2$  dispersions at different concentrations in water. (c) UV-Vis-NIR absorption spectra and (d) fitting curve of the absorption values at 808 nm of the blue  $\text{TiO}_2$  dispersions at different concentrations in 1640 culture medium containing 10% FBS.

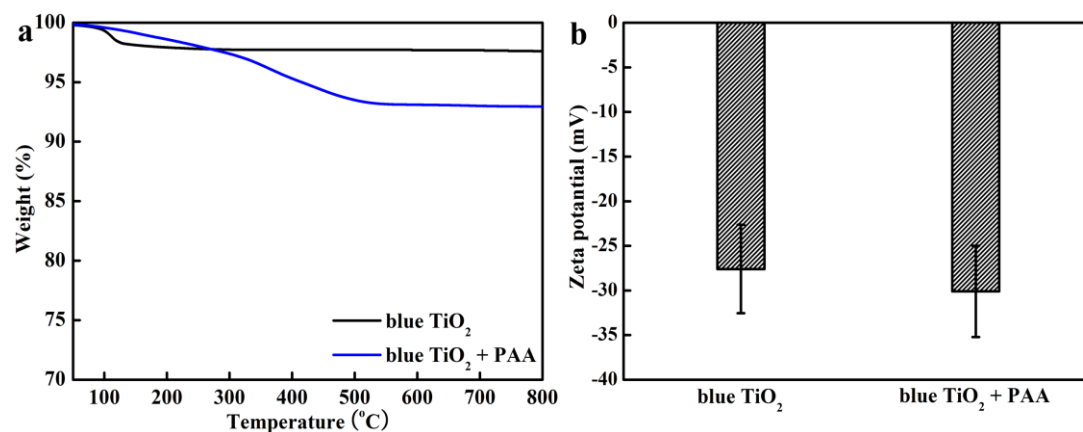

**Figure S4.** (a) TGA curves and (b) Zeta potential of the blue  $\text{TiO}_2$  before and after PAA coating.

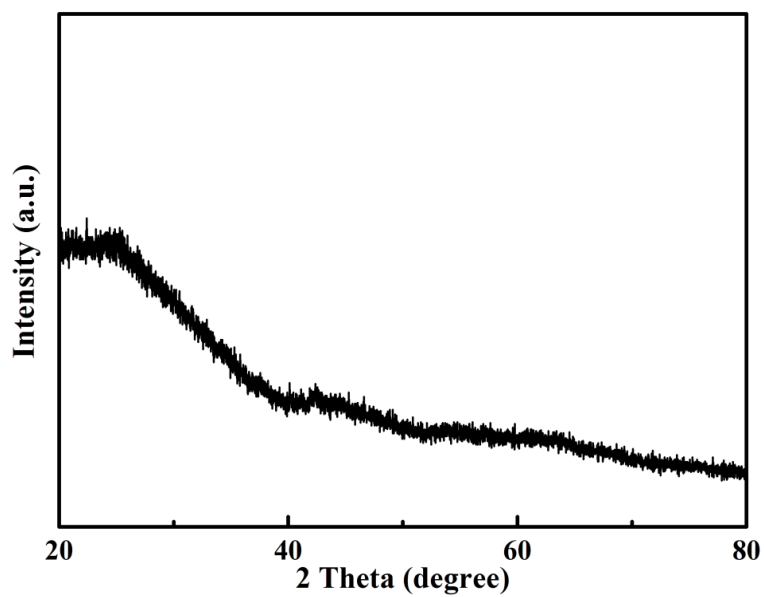

**Figure S5.** XRD of the black TiO<sub>2</sub>.

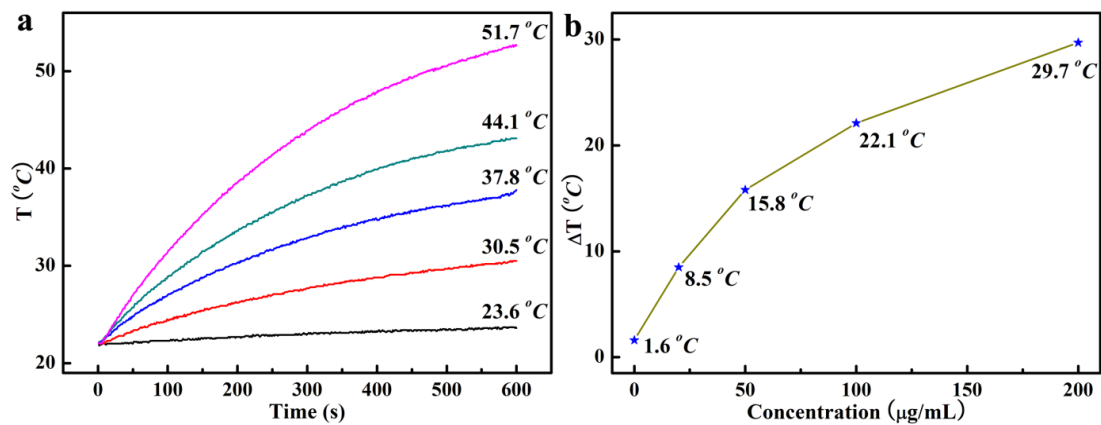

**Figure S6.** (a) Temperature elevation of the black TiO<sub>2</sub> suspension at various concentrations upon NIR irradiation; (b) Plot of temperature variation upon a 600 s irradiation *versus* the concentration of the black TiO<sub>2</sub>.

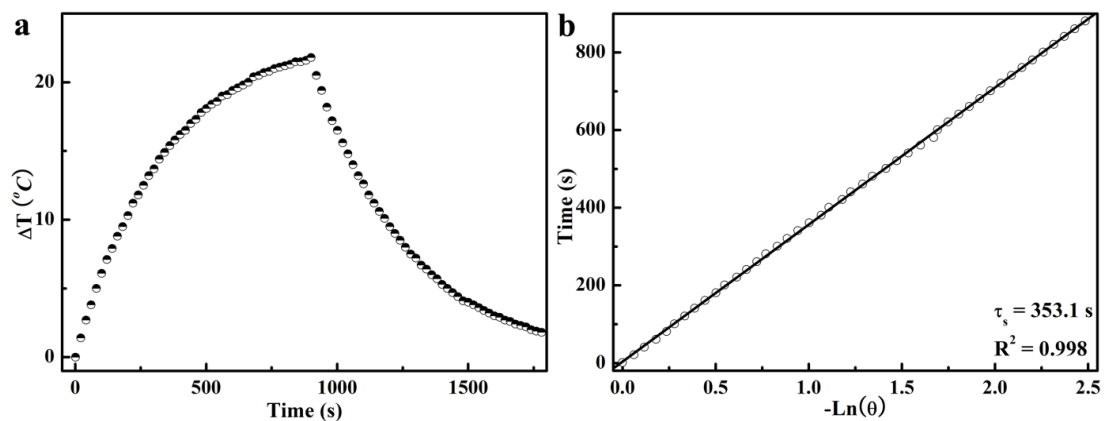

**Figure S7.** (a) Heating and cooling curves of the black  $\text{TiO}_2$  suspension (80  $\mu\text{g/mL}$ ); (b) Plot of cooling time versus negative natural logarithm of the temperature driving force.

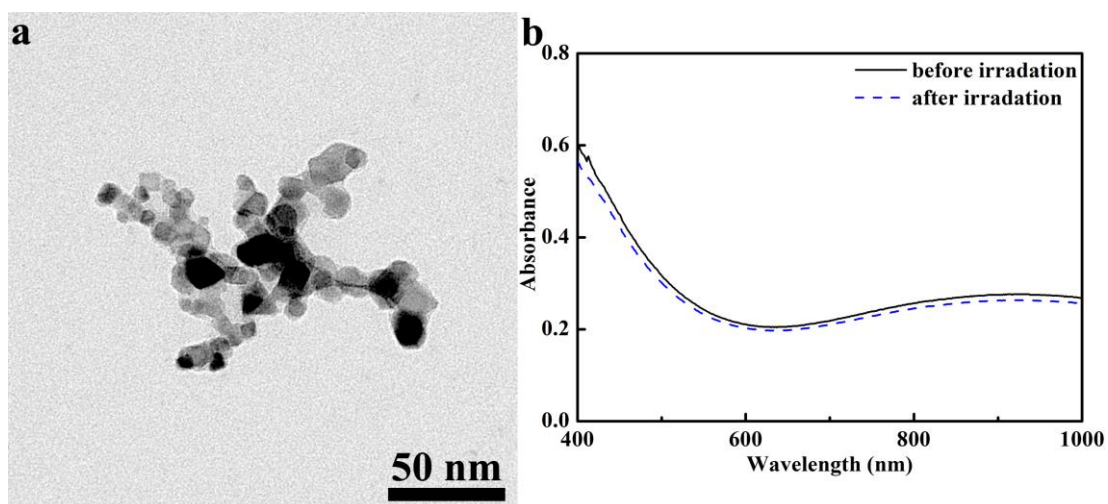

**Figure S8.** (a) TEM image and (b) UV-Vis-NIR of the blue  $\text{TiO}_2$  after five repeated irradiation.

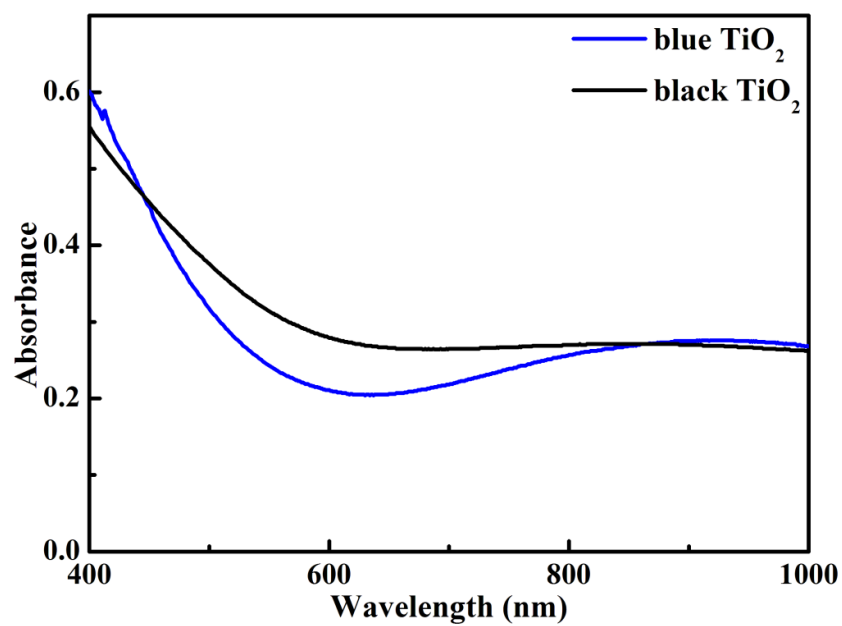

**Figure S9.** UV-vis-NIR absorption spectra of the blue and black  $\text{TiO}_2$  dispersion (80  $\mu\text{g/mL}$ ).

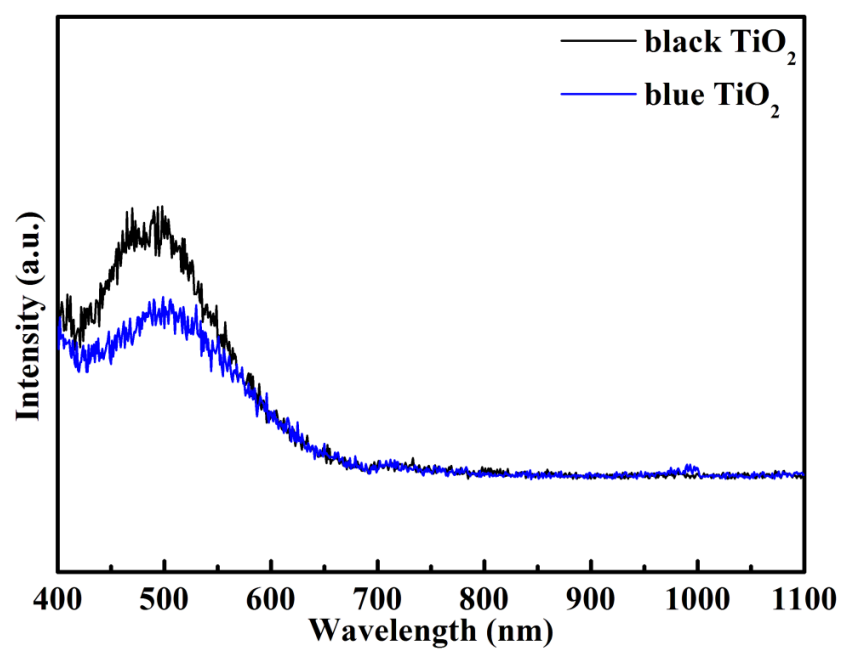

**Figure S10.** Photoluminescence emission spectra of the blue and black  $\text{TiO}_2$ .

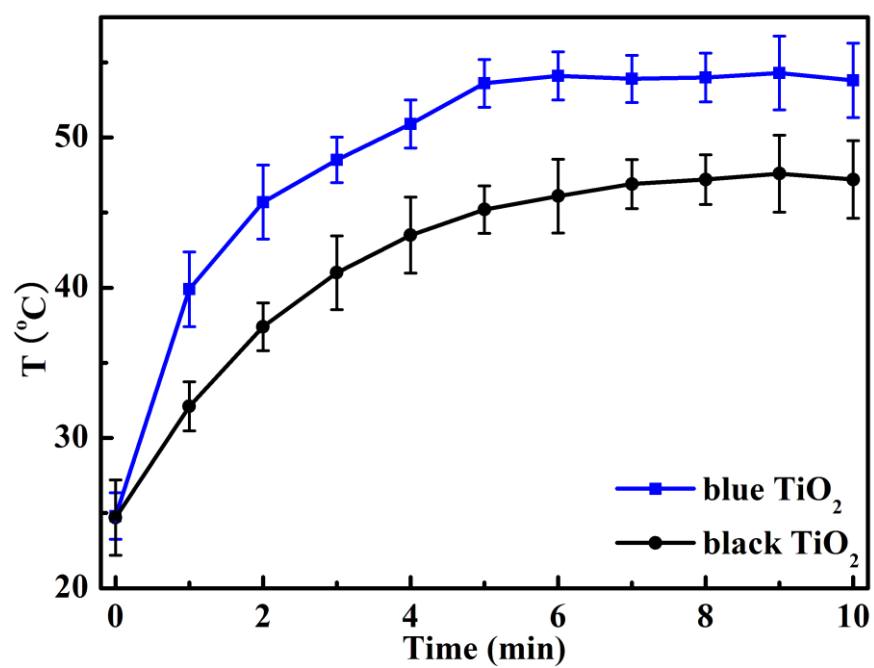

**Figure S11.** Temperature elevation of the blue and black TiO<sub>2</sub> placed on an 80 °C heating plate and measured at different time points (0-10 min).
